# Supplementary material
Source: Research Square preprint supplement (doi:10.21203/rs.3.rs-9770522/v1)
Supplement: Supplementary file 1 [file 8633c4ae726d5572b149d036.docx]

### **Appendices**

**Appendix A. Epistemic Architecture and Data Construction**

Appendix A provides a detailed description of the methodological architecture linking identification, descriptive analysis, and model-based consistency checks. It also documents the construction of variables from the Household Budget Survey, including the definition of exposure groups, sample selection criteria, and the implementation of entropy balancing.

**Appendix B. Full Robustness Suite and Placebo Battery**

Appendix B reports the full set of estimation results, including alternative specifications, sensitivity checks, and robustness to different clustering assumptions. It also contains the complete placebo battery across consumption domains, providing detailed evidence on the specificity of the salience channel.

**Appendix C. DSGE Model Specification and Impulse Response Validation**

Appendix C presents the full specification of the stylized DSGE model used to assess the internal consistency of the behavioral framework. It includes model equations, the perception augmented Phillips curve, and the conditions for equilibrium determinacy. Impulse responses are provided to illustrate how the model reproduces persistence in perceived inflation under standard assumptions.

**Appendix D. Bai Perron Structural Break Tests**

Appendix D reports the results of Bai Perron structural break tests for inflation, perceived inflation, and the perception gap. The estimated break points are used to illustrate the temporal alignment between behavioral stages and observed dynamics and serve a descriptive role rather than identification.

**Appendix E. Nominal Wage Data Construction and Decomposition**

Appendix E describes the construction of nominal wage series based on official data and reports the decomposition into inflation and real components using a Fisher type relationship. It also provides historical comparisons that place observed wage dynamics in a longer- term context.
